# Supplementary material for: Spatial Engineering of Osteochondral Tissue Constructs Through Microfluidically Directed Differentiation of Mesenchymal Stem Cells
Source: PubMed Central journal article supplement (PMC4854211; doi:10.1089/biores.2016.0005), 2016-04-01

## Supplementary Data

**Supplementary Table S1. RT-qPCR Primers**

| Function             | Gene                                      | Primer nucleotide sequence                                          |
|----------------------|-------------------------------------------|---------------------------------------------------------------------|
| Housekeeping genes   | ACTB                                      | Forward 5' GAGCGGGAATCGTCC<br>GTGAC 3'                              |
|                      |                                           | Reverse 5' GTGTTGGCGTAGAGGTC<br>CTTGC 3'                            |
|                      | GAPDH                                     | Forward 5' CCTTCATTGACCTTCACT<br>ACATGGTCTA 3'                      |
|                      |                                           | Reverse 5' TGAAGATGGTGATGGC<br>CTTCCATTG 3'                         |
| Chondrogenic markers | sox9                                      | Forward 5' CATGAAGATGACCGACG<br>AG 3'                               |
|                      |                                           | Reverse 5' CGTCTTCCGTGTCGGA 3'                                      |
|                      | Aggrecan                                  | Forward 5' CACTGTTACCGCCACTT<br>CCC 3'                              |
|                      |                                           | Reverse 5' GACATCGTTCCTACTCGC<br>CCT 3'                             |
|                      | col2 $\alpha$ 1                           | Forward 5' ATCCATTGCAAACCCAA<br>AGG 3'                              |
|                      |                                           | Reverse 5' CCAGTTCAGGTCTCTTAG<br>AG 3'                              |
| Hypertrophic marker  | colX $\alpha$ 1                           | Forward 5' CATGCTGCCACAAACAGC 3'<br>Reverse 5' TGGATGGTGGCCTTTTA 3' |
| Osteogenic markers   | runx2                                     | Forward 5' TTACAGACCCCAAGGCA<br>GGCACA 3'                           |
|                      |                                           | Reverse 5' TCCATCAGCGTCAACAC<br>CATCA 3'                            |
|                      | Osteocalcin                               | Forward 5' TGACAGACACCCATGA<br>GAACCC 3'                            |
|                      |                                           | Reverse 5' AGCTCTAGACTGGGCCGT<br>AGAAG 3'                           |
| col1 $\alpha$ 1      | Forward 5' TGCTGGCCAACCATGCC<br>TCT 3'    |                                                                     |
|                      | Reverse 5' CGACATCATTGGATCCTT<br>GCA G 3' |                                                                     |

ACTB,  $\beta$ -actin; GAPDH, glyceraldehyde-3-phosphate dehydrogenase; RT-qPCR, quantitative reverse transcription polymerase chain reaction.

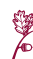

Supplement: Supp_Table.pdf [file Supp_Table.pdf]
